# Supplementary material for: The Skp1-Cullin1-FBXO1 complex is a pleiotropic regulator required for the formation of gametes and motile forms in Plasmodium berghei
Source: PubMed Central journal article supplement (PMC10006092; doi:10.1038/s41467-023-36999-8), 2023-03-10

## Supplementary information

### Supplementary figures

**Figure S1**

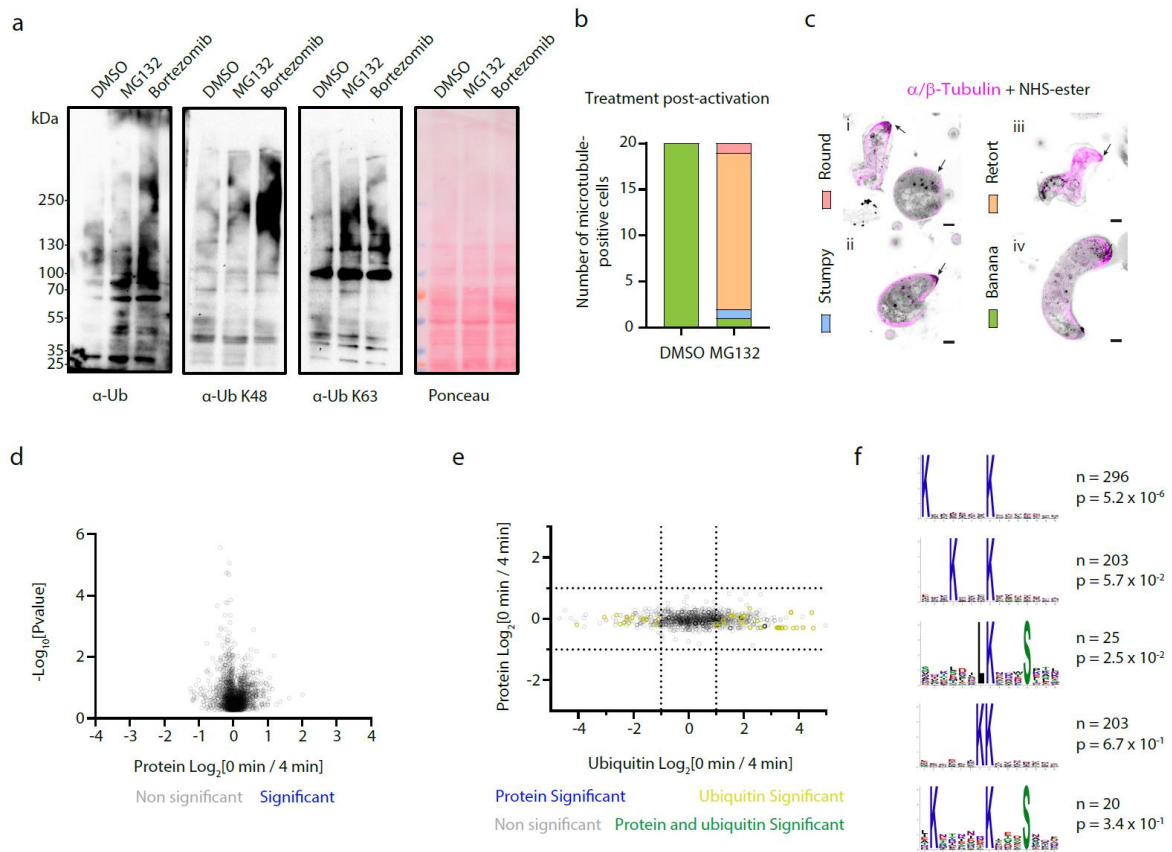

**Figure S1. a.** Western blot analysis with antibodies against Ubiquitin, Ubiquitin K48, and ubiquitin K63 of gametocyte lysates 10 minutes post-activation with xanthurenic acid. Gametocytes were treated pre-activation for 30 minutes with 1  $\mu$ M MG132 or 25  $\mu$ M bortezomib. The Ponceau staining serves as a loading control. Blots are representative of three independent replicates **b.** Treatment of gametocytes with 1  $\mu$ M MG132 one hour post-activation leads to altered ookinete formation as determined by partial stack projection of expanded ookinetes (40 cells from replicate 1 of Fig 1c). **c.** Representative confocal sections showing the quantified phenotypes by U-ExM. Arrows indicate the apical pole. Scale bar = 5  $\mu$ m. **d.** Volcano plot showing the extent of differentially detected proteins in non-activated and 4 min activated WT gametocytes. No significantly regulated sites ( $\text{Pvalue} < 0.05$  -

paired t-test) with a fold change >2 were identified (n = 3 biological replicates). **e.** Plot indicating relative abundance of proteins (3 biological replicates) and corresponding ubiquitinated peptides (technical duplicates from 2 biological replicates) in non-activated and 4 min activated WT gametocytes. Colours highlight significantly regulated ubiquitination events (yellow) and/ or protein levels (blue), technical duplicates from 2 biological replicates for the ubiquitome survey. **f.** Sequence logo depiction of the five significantly enriched ubiquitinated motifs detected by Motif X analysis.

**Figure S2**

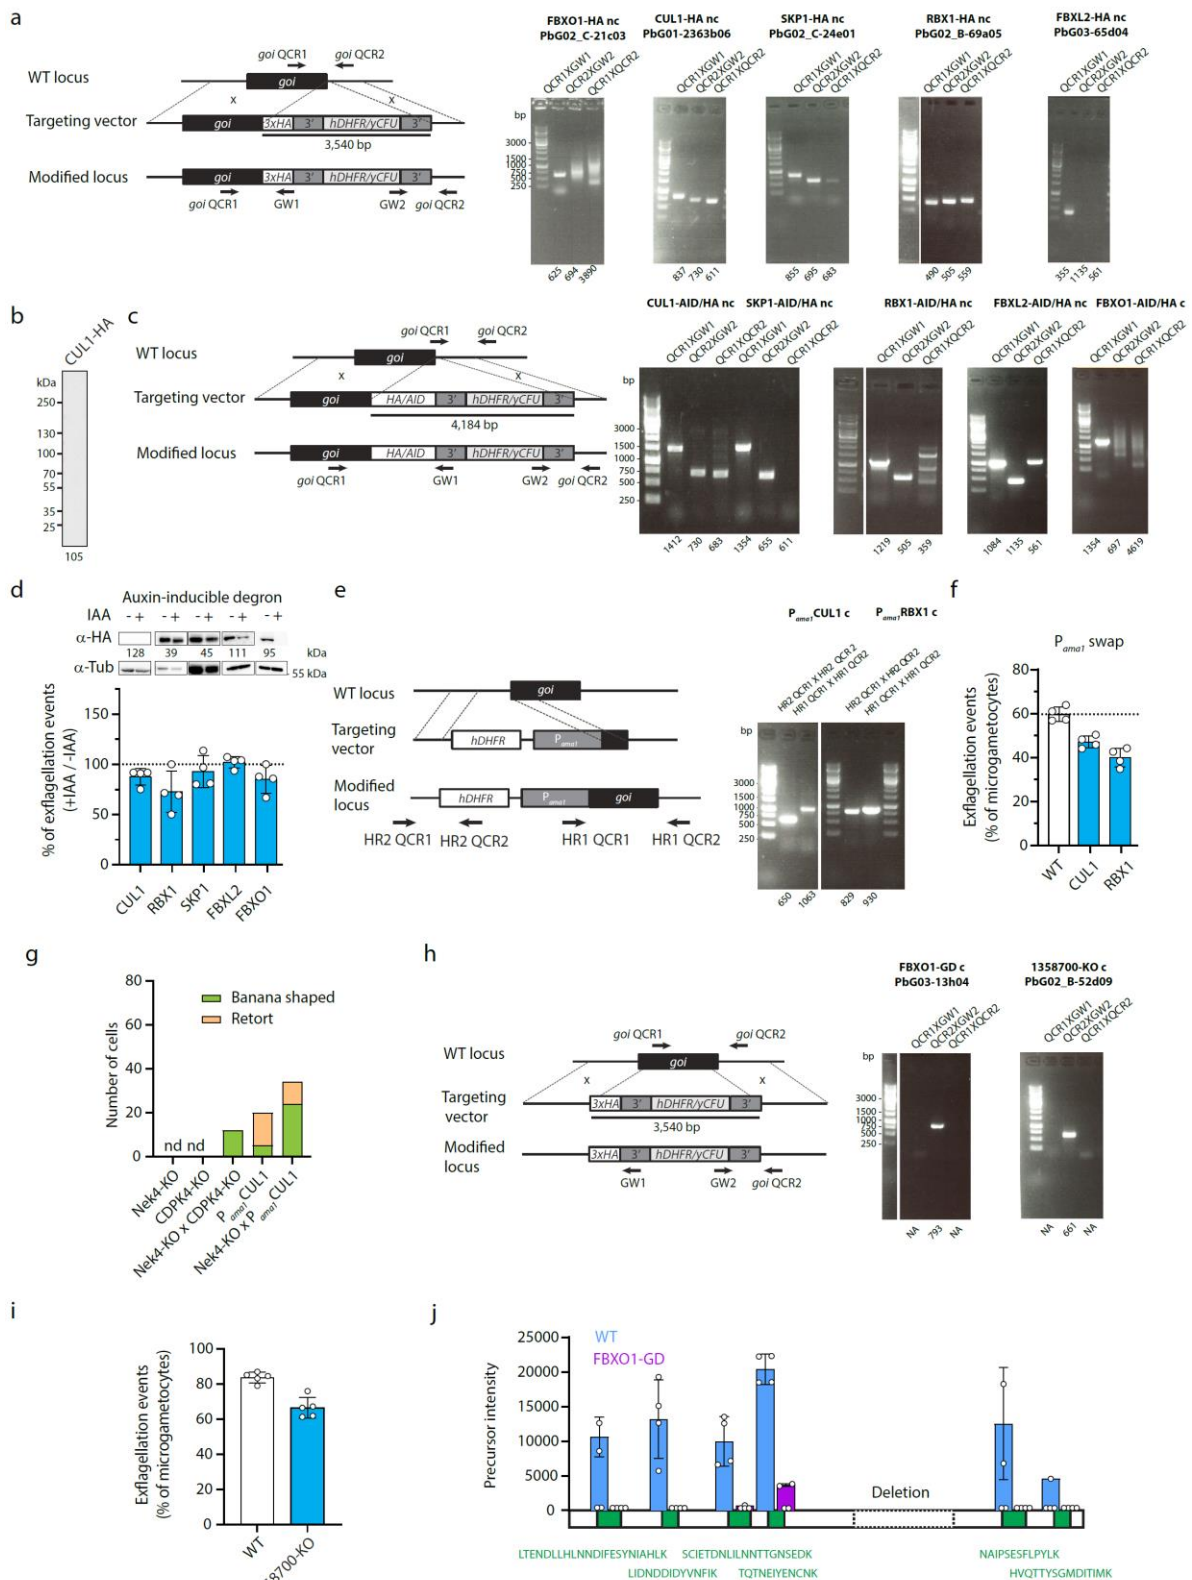

**Figure S2. a.** Genetic modification strategy for HA tagging and genotyping data. Oligonucleotides used for PCR genotyping are indicated and agarose gels for corresponding PCR products from genotyping

reactions are shown. The same marker size was used for all genotyping gels. PCR product sizes are indicated below each lane; NA: not amplifiable. In the line names, c is for cloned lines and nc for non-clonal lines, the ID below is the PlasmogEM vector from which the construct was derived. **b.** Western blot analysis of a gametocyte lysate from the line expressing endogenously HA-tagged CUL1 does not allow to detect the fusion protein. The blot is representative of four independent replicates from two transgenic lines. **c.** Genetic modification strategy for AID/HA tagging and genotyping data. Oligonucleotides used for PCR genotyping of non-clonal lines (except FBXO1-AID/HA) are indicated and agarose gels for corresponding PCR products from genotyping reactions are shown. **d.** Western blot analysis of protein degradation and relative exflagellation rate and upon IAA treatment for CUL1-AID/HA, RBX1-AID/HA, SKP1-AID/HA, FBXL2-AID/HA and FBXO1-AID/HA (error bars show standard deviation from the mean; technical replicates from four independent infections; unpaired two-tailed t-test). **e.** Genetic modification strategy for  $P_{ama1}$  promoter swaps and genotyping data. Oligonucleotides used for PCR genotyping of clonal lines are indicated and agarose gels for corresponding PCR products are shown. **f.** Effect of *cul1* and *rbx1* stage-specific downregulation on exflagellation (error bars show standard deviation from the mean; replicates from four independent infections). **g.** Number of banana-shaped or retort ookinetes from genetic crosses (66 cells counted from two biological replicates) of  $P_{ama1}$ CUL1 parasites and parasite lines defective for micro- (CDPK4-KO) and macro- (Nek4-KO) gamete formation. nd = not detected. **h.** Genetic modification strategy for gene KO or GD and genotyping data. Oligonucleotides used for PCR genotyping of clonal lines are indicated and agarose gels for corresponding PCR products are shown. **i.** Effect of *pbanka\_1358700* deletion on exflagellation (error bars show standard deviation from the mean; technical replicates from four independent infections). **j.** Precursor intensities for FBXO1 in the WT (blue) and FBXO1-GD (purple) lines for detected tryptic peptides (green) – technical duplicates from two biological replicates, error bars show standard deviation from the mean.

Figure S3

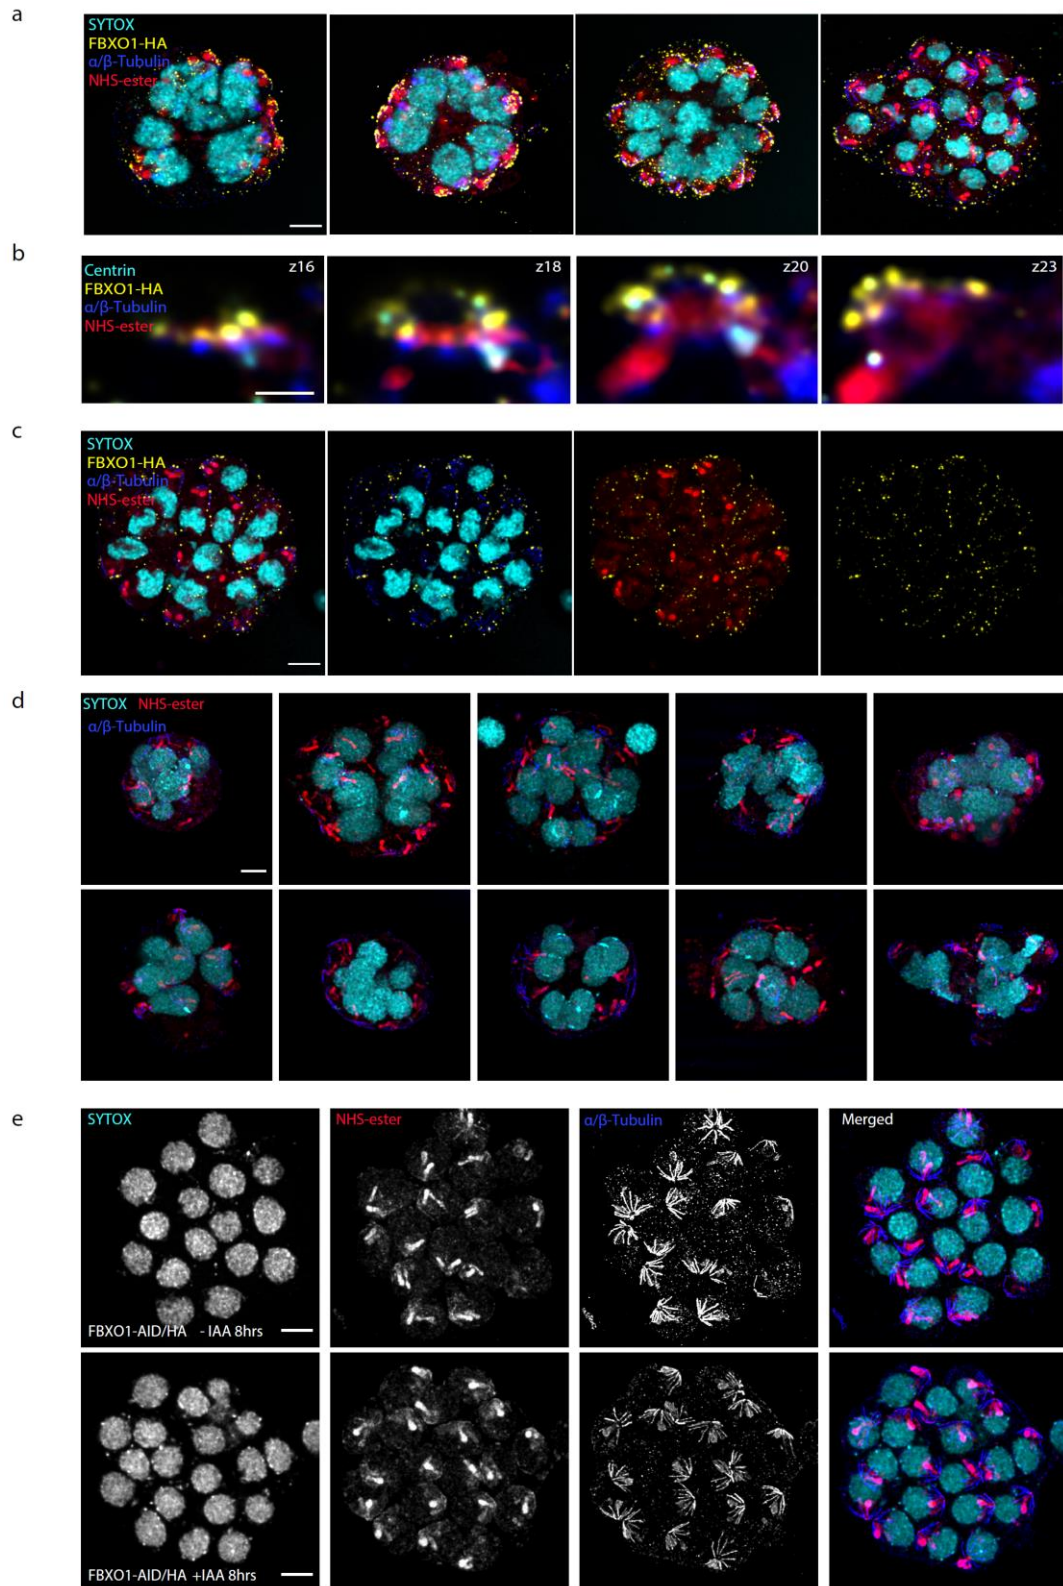

**Figure S3. a.** Representative full projections showing an overview of FBXO1-HA localisation during schizogony in expanded infected cells. HA: yellow;  $\alpha/\beta$ -Tubulin: dark blue; amine reactive groups/NHS-

ester: red, SYTOX (DNA): cyan. Scale bars = 5  $\mu\text{m}$ . **b.** Confocal sections of the boxed area shown in Fig. 3B showing the localisation of FBXO1-HA at the forming apical complex. HA: yellow;  $\alpha/\beta$ -Tubulin: dark blue; amine reactive groups/NHS-ester: red, SYTOX (DNA): cyan. Scale bar = 1  $\mu\text{m}$ . **c.** Representative full projections showing an overview of FBXO1-HA localisation of expanded segmented schizonts. HA: yellow;  $\alpha/\beta$ -Tubulin: dark blue; amine reactive groups/NHS-ester: red, SYTOX (DNA): cyan. Scale bars = 5  $\mu\text{m}$ . **d.** Gallery of full projections showing the effect of FBXO1-AID/HA depletion upon IAA/auxin addition upon parasite collection on schizogony as observed by U-ExM.  $\alpha/\beta$ -Tubulin: dark blue; amine reactive groups/NHS-ester: red, SYTOX (DNA): cyan. Scale bars = 5  $\mu\text{m}$ . **e.** Effect of FBXO1-AID/HA depletion upon IAA/auxin addition 8 hours post-parasite collection from mice on schizogony as observed by U-ExM.  $\alpha/\beta$ -Tubulin: dark blue; amine reactive groups/NHS-ester: red, SYTOX (DNA): cyan. Scale bars = 5  $\mu\text{m}$ . Images are representative of at least two independent infections.

**Figure S4**

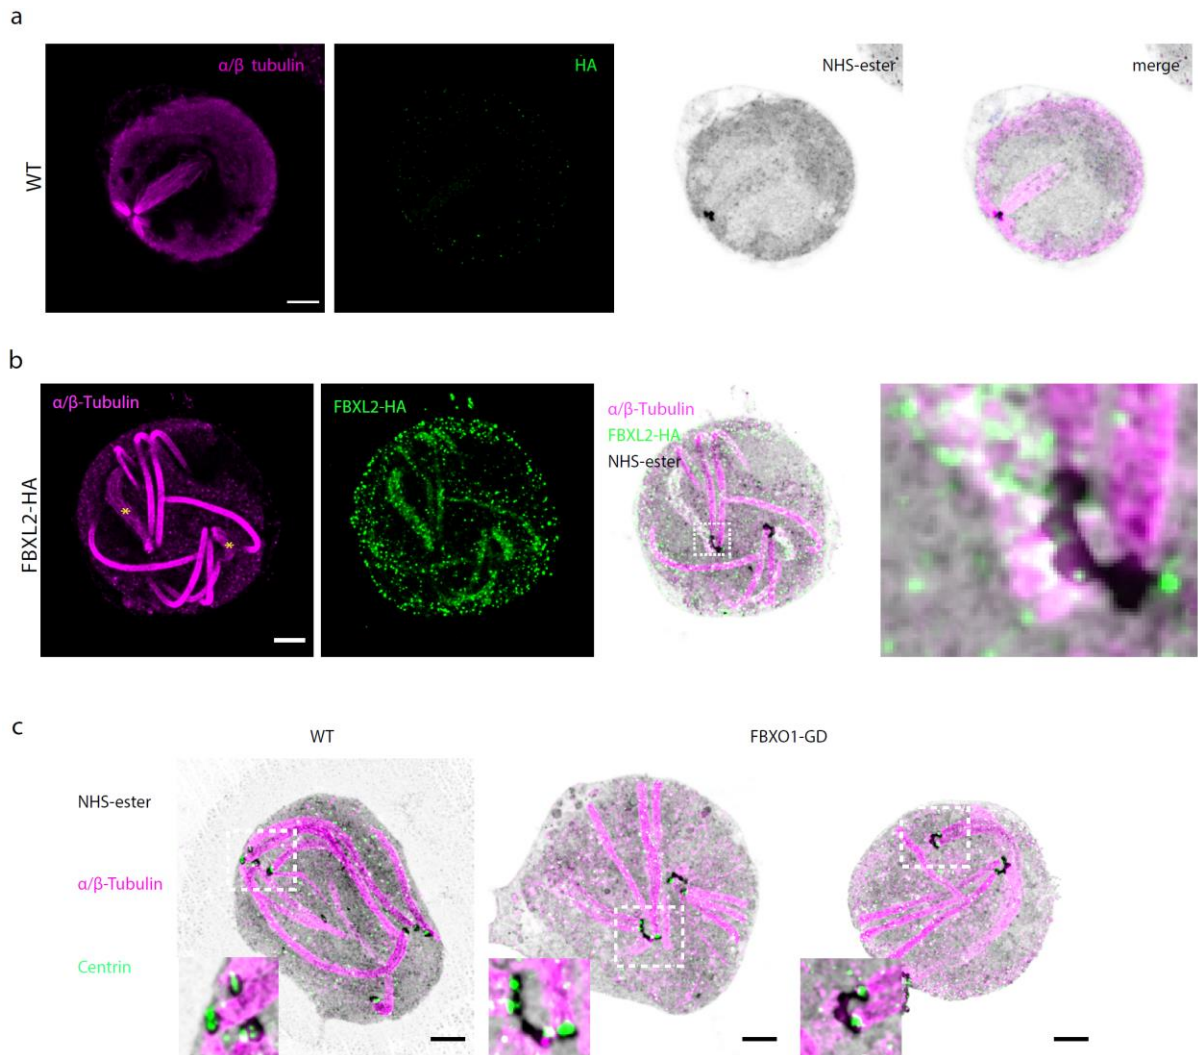

**Figure S4. U-ExM characterisation of the SCF complex in gametocytes.** **a.** Confocal section showing HA background signal after expansion in the WT line. HA: green;  $\alpha/\beta$ -Tubulin: magenta; amine reactive groups/NHS-ester: shades of grey. Scale bar = 5  $\mu$ m. **b.** U-ExM localisation of FBXL2-HA in activated *P. berghei* gametocytes (confocal section). HA: green;  $\alpha/\beta$ -Tubulin: magenta; amine reactive groups/NHS-ester: shades of grey. The inset shows details of the region around the microtubule organisation centre. Scale bar = 5  $\mu$ m. **c.** Confocal section showing segregation of microgametocyte centrosomes by U-ExM in WT and FBXO1-GD microgametocytes. Scale bar = 5  $\mu$ m. Centrin: green;  $\alpha/\beta$ -Tubulin: magenta; amine reactive groups/NHS-ester: shades of grey. Images are representative of two independent infections.

**Figure S5**

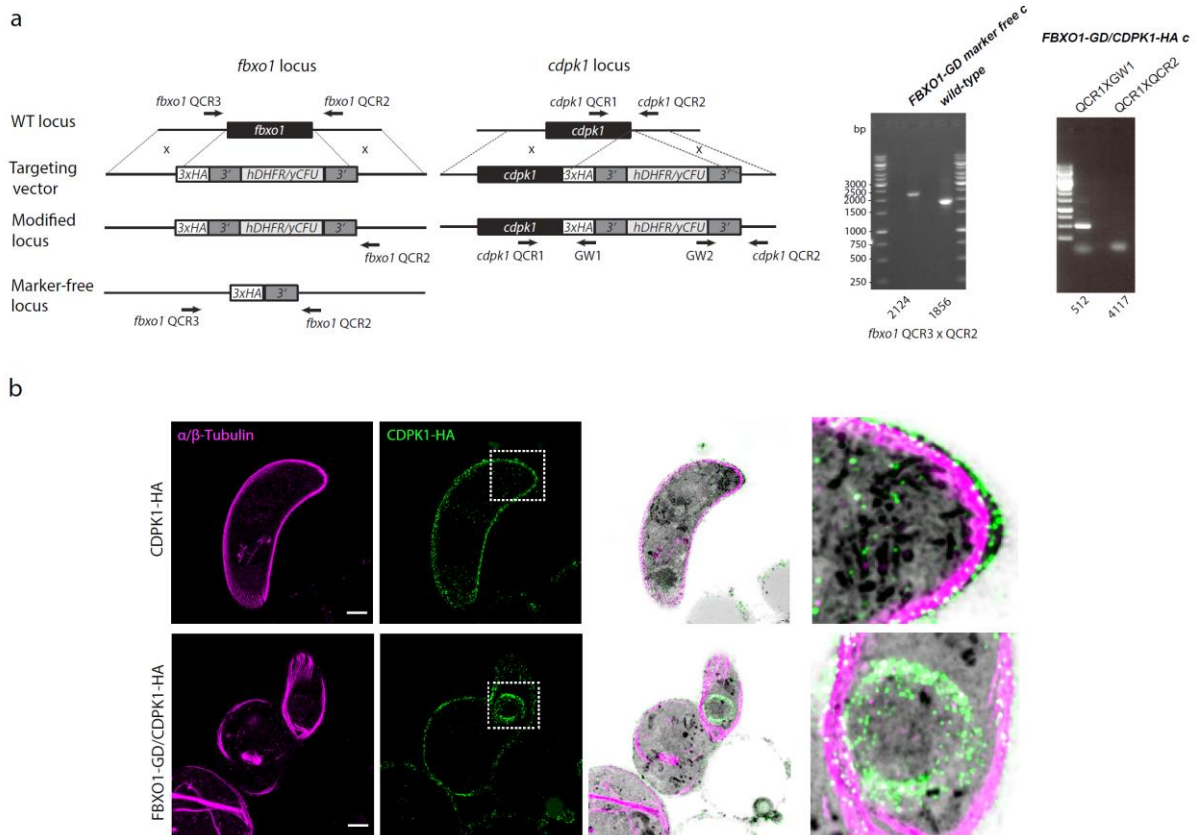

**Figure S5. a.** Genetic modification strategy for generating a FBXO1-GD marker-free line and a derived FBXO1-GD/CDPK1-HA clonal (c) line and genotyping data. Oligonucleotides used for PCR genotyping of clonal lines are indicated and agarose gels for corresponding PCR products from genotyping reactions are shown. **b.** Confocal section showing expanded CDPK1-HA and FBXO1-GD/CDPK1-HA ookinetes highlighting mis-localisation of CDPK1-HA upon *fbxo1* disruption. HA: green;  $\alpha/\beta$ -Tubulin: magenta; amine reactive groups/NHS-ester: shades of grey. Panels on the right show details of CDPK1-HA localisation in the regions of interest. Scale bars = 5  $\mu$ m. Images are representative of two independent infections.



**Figure S6**

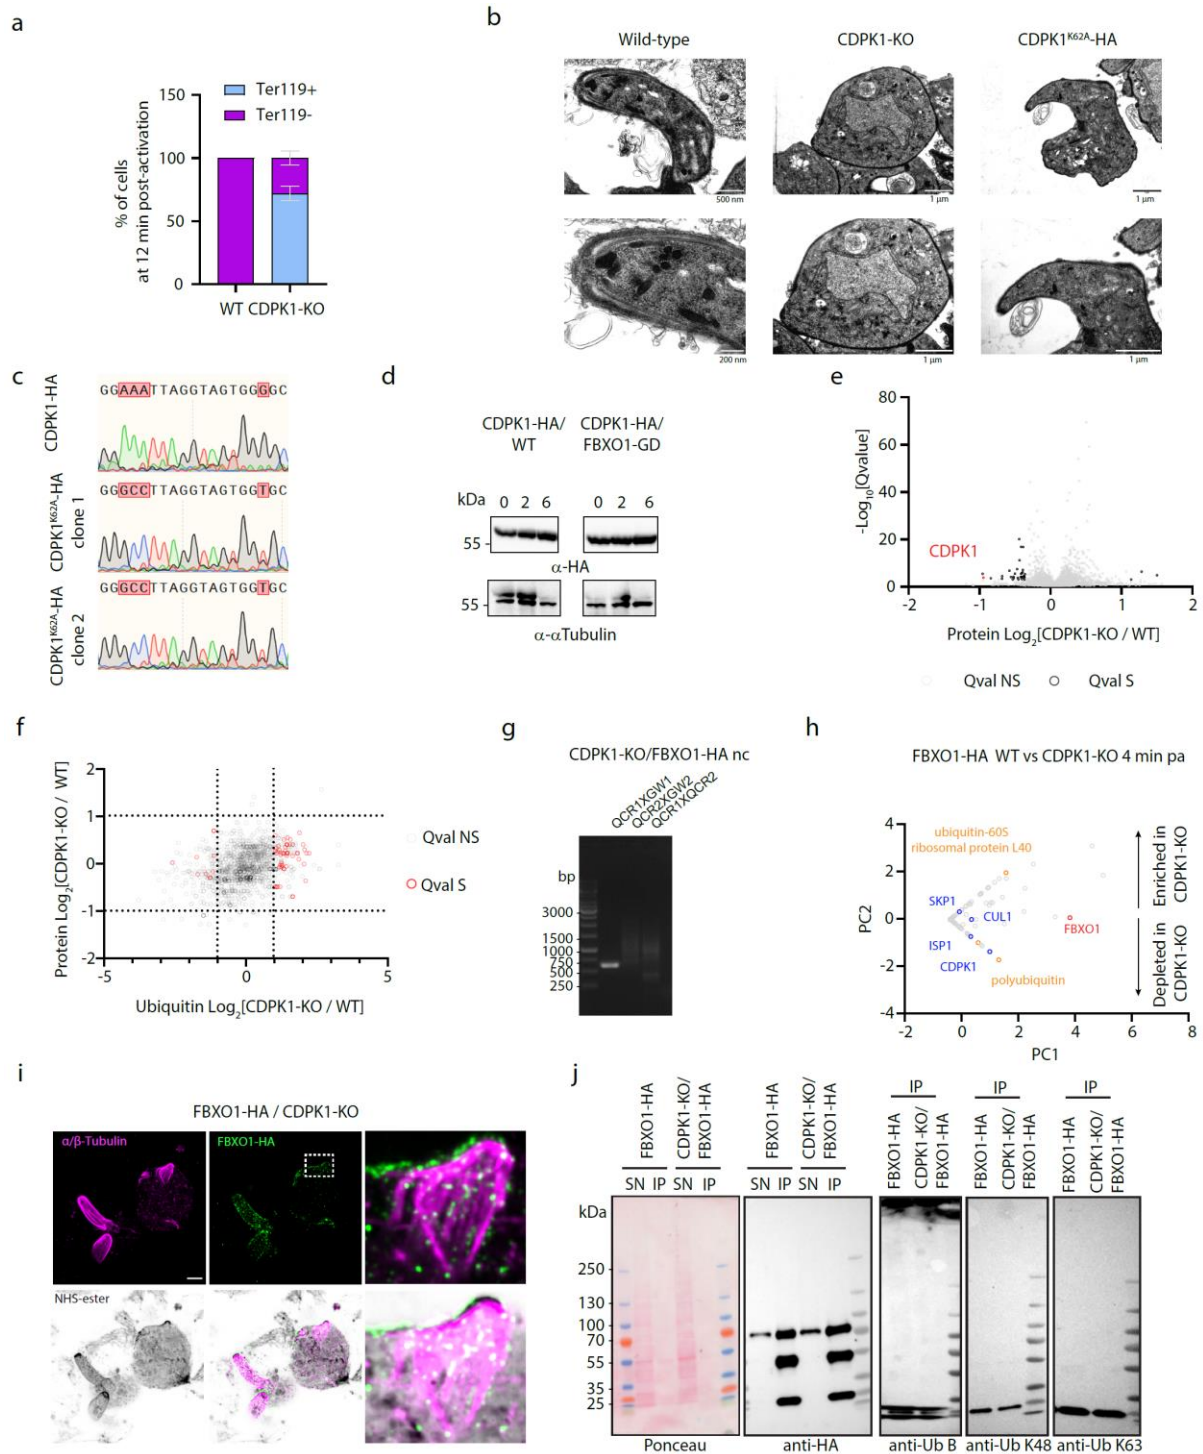

**Figure S6. a.** CDPK1-KO and WT gamete egress from host erythrocytes quantified by IFA based on the presence of the erythrocyte membrane marker Ter-119, 12 min post-activation (48 cells analysed from three replicates, error bars show standard deviation from the mean, one-way ANOVA). **b.** Characterisation by transmission electron microscopy of Wild-type, CDPK1-KO and CDPK1<sup>K62A</sup>-HA

ookinetes 20 hours post-activation. **c.** Sequence traces showing substitution of CDPK1 lysine 62 into alanine in two independent clones in the CDPK1-HA background from reference [30]. **d.** Western blot analysis of CDPK1-HA in WT and FBXO1-GD gametocyte lysates over the course of gametogenesis.  $\alpha$ -Tubulin serves as a loading control. Blots are representative of two independent infections. **e.** Volcano plot showing the extent of differentially detected proteins in WT and CDPK1-KO gametocytes 4 minutes post-activation. Significantly regulated sites ( $Q$ value $<0.05$  - paired t-test) with a fold change  $>2$  are highlighted in black ( $n = 3$  biological replicates). **f.** Plot indicating relative abundance of proteins (3 biological replicates) and corresponding ubiquitinated peptides (technical duplicates from 2 biological replicates) in CDPK1-KO compared to WT gametocytes four minutes post-activation. Red highlights significantly regulated ubiquitination events. **g.** Genotyping of FBXO1-HA tagging as in Fig. S2A in the CDPK1-KO background from reference [30]. **h.** emPAI values as identified by mass spectrometry for proteins co-purifying with FBXO1-HA, in WT and CDPK1-KO backgrounds following immunoprecipitation, and displayed in first and second principal components ( $n = 3$  biological replicates). Red: the immunoprecipitated protein; blue: components of the SCF complex; orange: ubiquitin-related proteins differentially immunoprecipitated with FBXO1-HA in WT and CDPK1-KO backgrounds. **i.** U-ExM localisation of FBXO1-HA in CDPK1-KO ookinetes. HA: green;  $\alpha/\beta$ -Tubulin: magenta; amine reactive groups/NHS-ester: shades of grey. Insets show details of the pellicle. Scale bars = 5  $\mu$ m. Images are representative of two independent cultures. **j.** Western blot analysis of FBXO1-HA cell lysates and immunoprecipitates in WT and CDPK1-KO backgrounds with anti-Ub B, anti-Ub K48, and anti-Ub K63 antibodies showing no detectable ubiquitination of FBXO1-HA with these antibodies. The Ponceau staining serves as a loading control. Blots are representative of two independent infections.

## Supplementary tables

**Table S1. Oligonucleotides used in this study**

| Primer name                  | Sequence 5' to 3'                                                          |
|------------------------------|----------------------------------------------------------------------------|
| GW1                          | CATACTAGCCATTTTATGTG                                                       |
| GW2                          | CTTTGGTGACAGATACTAC                                                        |
| <i>skp1</i> HA-F             | TAATAACTCCTTTTTAGATCCGAGAAGAAAACAAATGGTGTGGAGACATTAAGGCGCA<br>TAACGATACCAC |
| <i>skp1</i> HA-R             | TTTAAAAACAAATTATAATCCTCATTTATTTAAAATAAAAAAAGGAACCTCCGCCTACTG<br>CGACTATAGA |
| <i>skp1</i> HA QCR1          | ACGTGCATTGCAATGTTCCA                                                       |
| <i>skp1</i> HA QCR2          | ACAACCTGGCATGTTTGCTAATGA                                                   |
| <i>cul1</i> HA-F             | GAGAATATATTCAGAAAGAAGAAAATAGCCAAGTATATGTTTATATACCAAAGGCGCA<br>TAACGATACCAC |
| <i>cul1</i> HA-R             | ACTCATTAGATTAGTGGCATGATAAACGCTTCAAATTTGGTGTCTATTCCGCCTACTG<br>CGACTATAGA   |
| <i>cul1</i> HA QCR1          | ACAATGGCCATCGAAGCAGCT                                                      |
| <i>cul1</i> HA QCR2          | TGGTCTTCACCCAAACGGCA                                                       |
| <i>rbx1</i> HA-F             | AAGTTTGCCTTTAGATAATACTACTTGGGAATTCCAAAAAGCAACAATAAGGCGCAT<br>AACGATACCAC   |
| <i>rbx1</i> HA-R             | TAAATAAATATATACATATTAATGATAAACACAATAATAAGAAATATCCGCCTACTG<br>CGACTATAGA    |
| <i>rbx1</i> HA QCR1          | TGGTCAGCAGTAGCGGCATGG                                                      |
| <i>rbx1</i> HA QCR2          | ACTGGGATGGATGGCCTAAAA                                                      |
| <i>fbxo1</i> HA-F            | GAGTTGGCGATCATATTGTTTTTTATTTAATTAAAGGAGGAAATAATATTAAGGCGCAT<br>AACGATACCAC |
| <i>fbxo1</i> HA-R            | GCACTGATGTAGAAATCAAGAAAAGTAGATAAGTGCATATAACATAGAGCCCGCCTAC<br>TGCGACTATAGA |
| <i>fbxo1</i> HA QCR1         | AGCTGTTGAACCGGGTAAGAGCT                                                    |
| <i>fbxo1</i> HA QCR2         | GATGCCTCTCCCCTCCCC                                                         |
| 1358700 HA-F                 | TAAAGAGTTCTCTAAAAGAAGTTCCTTTGTGTATACACCCGACTAACCTTAAGGCGCAT<br>AACGATACCAC |
| 1358700 HA-R                 | TCTATAGTTTACTTATTTACACCCCTCTTAATTACTATATCTTAATTTCCGCCTACTGCG<br>ACTATAGA   |
| 1358700 HA QCR1              | ACCCTTCTGTTGGAGATCCTAGCCA                                                  |
| 1358700 HA QCR2              | ACCTGCCTCGAAAATACCGA                                                       |
| <i>fbxl2</i> HA-F            | AAATGTTTGAGACATCAATTTATATTGACATTGAATCCCTTGAGCAGAATAAGGCGCAT<br>AACGATACCAC |
| <i>fbxl2</i> HA-R            | TATTTTAAAGCTTCCGAAACGTGGGTATTACACTTTGCCACATTTTTTTCCGCCTACTGC<br>GACTATAGA  |
| <i>fbxl2</i> QCR1            | TCGTTCAATTTGCAGGAGCTGA                                                     |
| <i>fbxl2</i> QCR2            | TTTCTGCTCAGCCATTTCTGA                                                      |
| <i>cdpk1</i> HA QCR1         | TGTCTTAGGGGAGGCTGACCA                                                      |
| <i>cdpk1</i> HA QCR2         | TCCCTGCAAATGTTTTCCGCT                                                      |
| <i>fbxo1</i> KO-F            | AAAAAAGAGTATACCCCTTATTTCAAACCAGTCAATTTTTTTTACAAATACCGCCTACTG<br>CGACTATAGA |
| <i>fbxo1</i> KO-R            | TTATTAATTATGTGTGAAATATTTATATCATCTCCATTATTATATGATATAAGGCGCATAA<br>CGATACCAC |
| <i>fbxo1</i> KO QCR1         | CGAGACGGAAAAGAGGGTTTGTCCG                                                  |
| <i>fbxo1</i> KO QCR2         | AAGAACATGTTCAATTATTTAT                                                     |
| <i>fbxo1</i> KO QCR3         | GAGTGATTTAAAATATATATTGGACTAT                                               |
| 1358700 KO QCR1              | TGTTCTGAAAACCCCATACCT                                                      |
| 1358700 KO QCR2              | TGGCTAGGCCCATATGTGCGT                                                      |
| <i>Pama1cul1</i> HR1 forward | TTAATAAAATAAAACGATATAAAACATGGATATATCGAGCGTTAATTTTGAAGTGG                   |

|                                          |                                                                                    |
|------------------------------------------|------------------------------------------------------------------------------------|
| <i>Pama1Cul1</i> HR1 reverse             | ATTCGCGGCCGCGATATCTCGAAATAATTTTCATTATCTTTATCATCACTATTCCGC                          |
| <i>Pama1Cul1</i> HR2 forward             | GCTTGACCATGATTACGCCAAGCTTGCTAATTATAAAATATTACTAGCAAGCGTCTTTTT<br>ATTCAT             |
| <i>Pama1Cul1</i> HR2 reverse             | AAGAATTAAGCTGGGCTGCAATTGCTCTTGATCTTTAAACTCACGTATCAG                                |
| <i>Pama1Cul1</i> HR1 QCR1                | GGAATATAATTCAAAATGATTTGACAC                                                        |
| <i>Pama1Cul1</i> HR1 QCR2                | GAGAACAATATGTAAGTTCTTCTT                                                           |
| <i>Pama1Cul1</i> HR2 QCR1                | AAATATTTGTTGCAAGTAGTTA                                                             |
| <i>Pama1Cul1</i> HR2 QCR2                | ATGAAAATATTACTGGTGCTTTGA                                                           |
| <i>Pama1rbx1</i> HR1 forward             | TTAATAAAATAAAACGATATAAAACTCGAGATGATTAATAATATACGATCTGAGGAAAA<br>AGAAATATTCAAAGTTCAC |
| <i>Pama1rbx1</i> HR1 reverse             | ATTCGCGGCCGCGATATCAGAAACATAAATAAAATATTTTAACACATGAAAAAATGTCA<br>TAAAATGCG           |
| <i>Pama1rbx1</i> HR2 forward             | GCTTGACCATGATTACGCCAAGCTTTATGATAGATGCTGCGTCATATAAATGATATTCTT<br>ATTTTTT            |
| <i>Pama1rbx1</i> HR2 reverse             | AAGAATTAAGCTGGGCTGCAGTATAATTATTCTTCTTTCTTTATAAAAATTATGACTTT<br>ATGAATTTATC         |
| <i>Pama1rbx1</i> HR1 QCR1                | GGAATATAATTCAAAATGATTTGACAC                                                        |
| <i>Pama1rbx1</i> HR2 QCR2                | CTATTATATTATCCATTGCCAG                                                             |
| <i>Pama1rbx1</i> HR2 QCR1                | AAGTTTTCCATATTAGGGTTA                                                              |
| <i>Pama1rbx1</i> HR2 QCR2                | ATGAAAATATTACTGGTGCTTTGA                                                           |
| <i>cdpk1<sup>K62A</sup></i> HR1 forward  | GCTATGACCATGATTACGCCAAGCTTAAAATAAATATACATATATGTGCGCATTACAC<br>ACACAAA              |
| <i>cdpk1<sup>K62A</sup></i> HR1 reverse  | TCACCATATGCACCACTACCTAAGGCCCGAACTTTAAAATACGATTACCAAT                               |
| <i>cdpk1<sup>K62A</sup></i> HR2 forward  | TAGGTAGTGGTGCATATGGTGAGGTTTTATTATGCAAAGAAAAGAAC                                    |
| <i>cdpk1<sup>K62A</sup></i> HR2 reverse  | TGAATATTAATTGTAAACTTAAGGAATTCAACTTCAGGAGCTATATAATATGCAGTAC<br>CT                   |
| <i>cdpk1<sup>K62A</sup></i> gRNA forward | TATTAGTTCGGAAATTAGGTAGTG                                                           |
| <i>cdpk1<sup>K62A</sup></i> gRNA reverse | AAACCACTACCTAATTTCCGAAC                                                            |
| gRNA reverse                             | CAAATAGGGGTTCCGCGCAC                                                               |
| <i>cdpk1<sup>K62A</sup></i> QCR1         | GTGATTTAAATTAACATGAA                                                               |
| <i>cdpk1<sup>K62A</sup></i> QCR2         | ATTTCCGAAAACGTTGTATCCTC                                                            |
| <i>cdpk1<sup>K62A</sup></i> QCR3         | GAAGGATACAACGTTTTGCGAAAT                                                           |
| <i>cdpk1<sup>K62A</sup></i> QCR4         | TCATTGACACGAACTCGTCTGA                                                             |
| <i>cdpk1<sup>K62A</sup></i> QCR5         | GTGAATAAAAAGCTATATGGTATAGC                                                         |
| <i>cdpk1<sup>K62A</sup></i> QCR6         | TATATGACGGATTTCGAATTGCA                                                            |
| <i>cdpk1<sup>K62A</sup></i> QCR7         | TTCTCTCACATCATTTGCAC                                                               |

**Table S2. Main reagents used or generated in this study**

| Reagent type or resource   | Designation                 | Source or reference         | Identifiers | Additional information |
|----------------------------|-----------------------------|-----------------------------|-------------|------------------------|
| Cell line <i>P.berghei</i> | ANKA 2.34 clonal            | Billker <i>et al</i> , 2004 |             |                        |
| Cell line <i>P.berghei</i> | Cullin1-AID/HA non-clonal   | This study                  |             |                        |
| Cell line <i>P.berghei</i> | SKP1-AID/HA non-clonal      | This study                  |             |                        |
| Cell line <i>P.berghei</i> | RBX1-AID/HA non-clonal      | This study                  |             |                        |
| Cell line <i>P.berghei</i> | FBXL2-AID/HA non-clonal     | This study                  |             |                        |
| Cell line <i>P.berghei</i> | FBXO1-AID/HA clonal         | This study                  |             |                        |
| Cell line <i>P.berghei</i> | CUL1-HA non-clonal          | This study                  |             |                        |
| Cell line <i>P.berghei</i> | SKP1-HA non-clonal          | This study                  |             |                        |
| Cell line <i>P.berghei</i> | RBX1-HA non-clonal          | This study                  |             |                        |
| Cell line <i>P.berghei</i> | FBXL2-HA non-clonal         | This study                  |             |                        |
| Cell line <i>P.berghei</i> | FBXO1-HA marker free clonal | This study                  |             |                        |
| Cell line <i>P.berghei</i> | FBXO1-GFP non-clonal        | This study                  |             |                        |

|                            |                                                                  |                           |             |                    |
|----------------------------|------------------------------------------------------------------|---------------------------|-------------|--------------------|
| Cell line <i>P.berghei</i> | <i>Pama1</i> CUL1 clonal                                         | This study                |             |                    |
| Cell line <i>P.berghei</i> | <i>Pama1</i> RBX1 clonal                                         | This study                |             |                    |
| Cell line <i>P.berghei</i> | CDPK1-HA marker free clonal                                      | Fang <i>et al</i> , 2018  |             |                    |
| Cell line <i>P.berghei</i> | FBXO1-GD marker free clonal                                      | This study                |             |                    |
| Cell line <i>P.berghei</i> | FBXO1-GD/CDPK1-HA clonal                                         | This study                |             |                    |
| Cell line <i>P.berghei</i> | CDPK1-KO/FBXO1-HA clonal                                         | This study                |             |                    |
| Cell line <i>P.berghei</i> | CDPK1-HA-K62A clone 1                                            | This study                |             |                    |
| Cell line <i>P.berghei</i> | CDPK1-HA-K62A clone 2                                            | This study                |             |                    |
| Antibody                   | Centrin mouse (20H5)                                             | Merck Millipore           | 04-1624     | U-ExM: 1:500       |
| Antibody                   | $\alpha$ -tubulin, guinea pig                                    | Unige antibody platform   | AA345       | U-ExM: 1:250       |
| Antibody                   | $\beta$ -tubulin, guinea pig                                     | Unige antibody platform   | AA344       | U-ExM: 1:250       |
| Antibody                   | MTIP                                                             | Jones <i>et al</i> , 2006 |             | IFA: 1:1000        |
| Antibody                   | HA Rat (3F10)                                                    | Roche                     | 11815016001 | U-ExM: 1:250       |
| Antibody                   | GFP                                                              | Torrey Pines Biolabs      | TP401       | U-ExM: 1:250       |
| Antibody                   | Ubiquitin (ubiquitin B)                                          | ThermoFisher              | PA1-26088   | WB: 1:1000         |
| Antibody                   | Ter119                                                           | Invitrogen                | 11-5921-82  | IFA: 1:1000        |
| Antibody                   | c-myc                                                            | Sigma-Aldrich             | SAB4300319  | WB: 1:1000         |
| Antibody                   | Anti-Ubiquitin K48                                               | Merck                     | ZRB2150     | WB: 1:10000        |
| Antibody                   | Anti-Ubiquitin K63                                               | Merck                     | 05-1308     | WB: 1:1000         |
| Antibody                   | anti-mouse Alexa 488                                             | Invitrogen                | A11001      | U-ExM: 1:400       |
| Antibody                   | anti-guinea pig 488                                              | Invitrogen                | A11073      | U-ExM: 1:400       |
| Antibody                   | anti-rat 488                                                     | Invitrogen                | A11006      | U-ExM: 1:400       |
| Antibody                   | anti-rabbit Alexa 405                                            | Invitrogen                | A31556      | U-ExM: 1:400       |
| Antibody                   | anti-mouse Alexa 405                                             | Invitrogen                | A31553      | U-ExM: 1:400       |
| Antibody                   | anti-guinea pig Alexa 647                                        | Invitrogen                | A21450      | U-ExM: 1:400       |
| Antibody                   | anti-guinea pig 405                                              | abcam                     | ab175678    | U-ExM: 1:400       |
| Chemical                   | Atto 594 NHS-ester                                               | Merck                     | 8741        | 10 $\mu$ g/mL      |
| Chemical                   | 488 NHS-ester                                                    | ThermoFisher              | 46402       | 5 $\mu$ g/ml       |
| Chemical                   | Hoechst 33342                                                    | Invitrogen                | H3570       | IFA: 1:1000        |
| Chemical                   | SYTOX <sup>TM</sup> Deep Red                                     | ThermoFisher              | S11381      | U-ExM: 0.5 $\mu$ M |
| Chemical                   | PTMScan <sup>®</sup> Ubiquitin Remnant Motif (K- $\epsilon$ -GG) | CST                       | 5562        |                    |
| Chemical                   | tris(2-carboxyethyl)phosphine                                    | ThermoFisher              | 77720       |                    |
| Chemical                   | Iodoacetamide                                                    | Sigma- Aldrich            | I1149       |                    |
| Chemical                   | triethylammonium bicarbonate (TEAB)                              | Sigma- Aldrich            | T7408       |                    |
| Chemical                   | Pierce <sup>TM</sup> 660nm Protein Assay Kit                     | ThermoFisher              | 22662       |                    |
| Chemical                   | tris(2-carboxyethyl)phosphine                                    | ThermoFisher              | 77720       |                    |

## Uncropped scans of western blots shown in supplementary figures

Fig S1

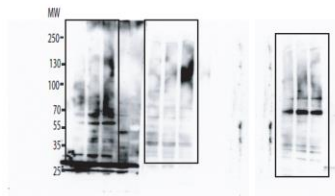

Fig S2B

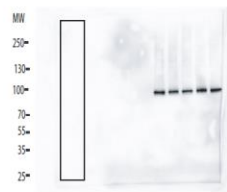

Fig S2D

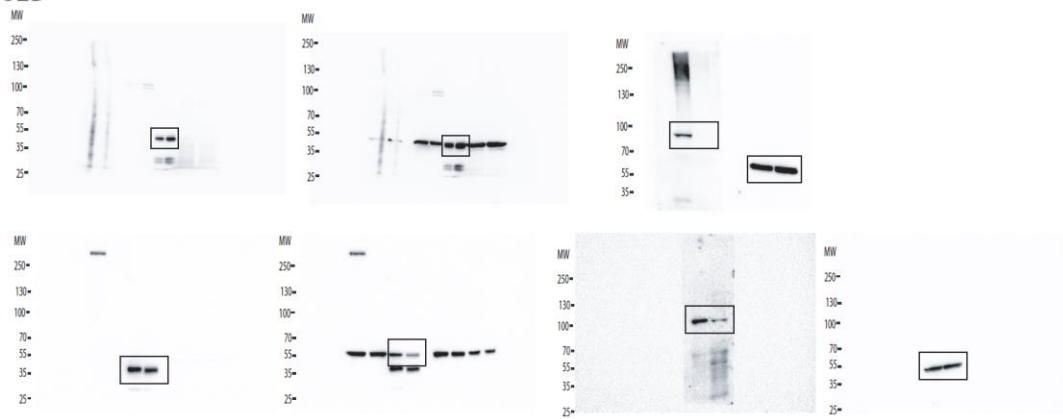

Fig S6E

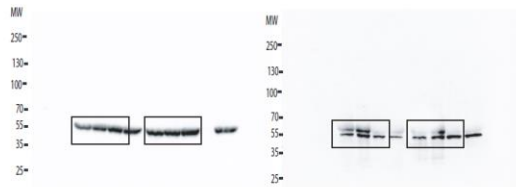

Fig S6L

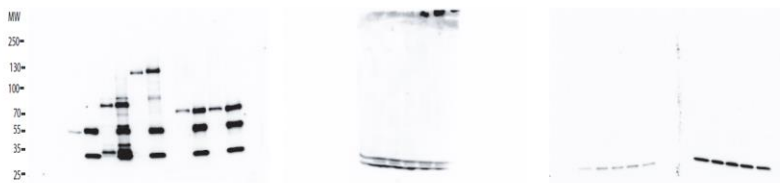

Supplement: 41467_2023_36999_MOESM1_ESM.pdf [file 41467_2023_36999_MOESM1_ESM.pdf]
