# Supplementary material for: The Skp1-Cullin1-FBXO1 complex is a pleiotropic regulator required for the formation of gametes and motile forms in Plasmodium berghei
Source: PubMed Central journal article supplement (PMC10006092; doi:10.1038/s41467-023-36999-8), 2023-03-10
Supplement: 41467_2023_36999_MOESM9_ESM.pdf [file 41467_2023_36999_MOESM9_ESM.pdf]

## Reporting Summary

Nature Portfolio wishes to improve the reproducibility of the work that we publish. This form provides structure for consistency and transparency in reporting. For further information on Nature Portfolio policies, see our [Editorial Policies](#) and the [Editorial Policy Checklist](#).

### Statistics

For all statistical analyses, confirm that the following items are present in the figure legend, table legend, main text, or Methods section.

n/a Confirmed

- The exact sample size ( $n$ ) for each experimental group/condition, given as a discrete number and unit of measurement
- A statement on whether measurements were taken from distinct samples or whether the same sample was measured repeatedly
- The statistical test(s) used AND whether they are one- or two-sided  
*Only common tests should be described solely by name; describe more complex techniques in the Methods section.*
- A description of all covariates tested
- A description of any assumptions or corrections, such as tests of normality and adjustment for multiple comparisons
- A full description of the statistical parameters including central tendency (e.g. means) or other basic estimates (e.g. regression coefficient) AND variation (e.g. standard deviation) or associated estimates of uncertainty (e.g. confidence intervals)
- For null hypothesis testing, the test statistic (e.g.  $F$ ,  $t$ ,  $r$ ) with confidence intervals, effect sizes, degrees of freedom and  $P$  value noted  
*Give  $P$  values as exact values whenever suitable.*
- For Bayesian analysis, information on the choice of priors and Markov chain Monte Carlo settings
- For hierarchical and complex designs, identification of the appropriate level for tests and full reporting of outcomes
- Estimates of effect sizes (e.g. Cohen's  $d$ , Pearson's  $r$ ), indicating how they were calculated

*Our web collection on [statistics for biologists](#) contains articles on many of the points above.*

### Software and code

Policy information about [availability of computer code](#)

Data collection

iTEM FEI (Olympus), ZEN 2.6 (Zeiss) and LAS X version 3.5.7.23225 (Leica) were used for image acquisition

Data analysis

Image J 1.53, LAS X version 3.5.7.23225 (Leica) were used for image analysis  
Excel (v1108), GraphPad Prism 9 (9.5.1) were used for data and statistical analysis  
Bio-Rad Image Lab (6.1) was used for western blot analysis  
Cytoscape (3.9.0), R package were used for proteomic data analysis and representation  
ClusterProfiler 3.8 was used for Gene Ontologies term enrichment analysis  
Motif-x algorithm proposed through the MoMo tool included in the MEME Suite was used for motif enrichment analysis  
Spectronaut v.15 (Biognosys) was used for DIA analysis  
Mascot (Matrix Science, London, UK; version 2.5.1) was used for the peak list files searches against the PlasmoDB\_P.berghei ANKA database (PlasmoDB.org, release 38)

For manuscripts utilizing custom algorithms or software that are central to the research but not yet described in published literature, software must be made available to editors and reviewers. We strongly encourage code deposition in a community repository (e.g. GitHub). See the Nature Portfolio [guidelines for submitting code & software](#) for further information.

## Data

Policy information about [availability of data](#)

All manuscripts must include a [data availability statement](#). This statement should provide the following information, where applicable:

- Accession codes, unique identifiers, or web links for publicly available datasets
- A description of any restrictions on data availability
- For clinical datasets or third party data, please ensure that the statement adheres to our [policy](#)

All data needed to evaluate the conclusions in the paper are present in the paper and/or the Supplementary Information. Source data are provided with this paper. The mass spectrometry proteomics data generated in this study have been deposited to the ProteomeXchange Consortium via the PRIDE partner repository (<http://proteomecentral.proteomexchange.org>) with the dataset identifiers PXD035526 and PXD035557.

## Human research participants

Policy information about [studies involving human research participants and Sex and Gender in Research](#).

Reporting on sex and gender

NA

Population characteristics

NA

Recruitment

NA

Ethics oversight

NA

Note that full information on the approval of the study protocol must also be provided in the manuscript.

## Field-specific reporting

Please select the one below that is the best fit for your research. If you are not sure, read the appropriate sections before making your selection.

- Life sciences       Behavioural & social sciences       Ecological, evolutionary & environmental sciences

For a reference copy of the document with all sections, see [nature.com/documents/nr-reporting-summary-flat.pdf](https://www.nature.com/documents/nr-reporting-summary-flat.pdf)

## Life sciences study design

All studies must disclose on these points even when the disclosure is negative.

Sample size

Sample size was determined according to the similar kind of experiments previously published by us our other groups, including for example PMID36006241, 35077503, 33705377, 32568069, 30315162 and 24594931. These sample sizes were sufficient to carry out the experiments with sufficient statistics and standard using t-test and other test.

Data exclusions

No data were excluded.

Replication

Repeated measures are shown in the Figure and legend.

Randomization

All parasite samples were randomly selected from the available population.

Blinding

The investigators were not blinded for experiments comprising objective measurements such as western blotting, IFA and U-ExM. For mass spectrometry analysis, investigators performing mass spectrometry data collection and analysis were blinded to experimental groups.

## Reporting for specific materials, systems and methods

We require information from authors about some types of materials, experimental systems and methods used in many studies. Here, indicate whether each material, system or method listed is relevant to your study. If you are not sure if a list item applies to your research, read the appropriate section before selecting a response.

## Materials &amp; experimental systems

| n/a                                 | Involvement                                                     |
|-------------------------------------|-----------------------------------------------------------------|
| <input type="checkbox"/>            | <input checked="" type="checkbox"/> Antibodies                  |
| <input type="checkbox"/>            | <input checked="" type="checkbox"/> Eukaryotic cell lines       |
| <input checked="" type="checkbox"/> | <input type="checkbox"/> Palaeontology and archaeology          |
| <input type="checkbox"/>            | <input checked="" type="checkbox"/> Animals and other organisms |
| <input checked="" type="checkbox"/> | <input type="checkbox"/> Clinical data                          |
| <input checked="" type="checkbox"/> | <input type="checkbox"/> Dual use research of concern           |

## Methods

| n/a                                 | Involvement                                     |
|-------------------------------------|-------------------------------------------------|
| <input checked="" type="checkbox"/> | <input type="checkbox"/> ChIP-seq               |
| <input checked="" type="checkbox"/> | <input type="checkbox"/> Flow cytometry         |
| <input checked="" type="checkbox"/> | <input type="checkbox"/> MRI-based neuroimaging |

## Antibodies

## Antibodies used

Centrin, mouse (20H5), Merck Millipore,04-1624, 1:500  
 $\alpha$ -tubulin, guinea pig, Unige antibody platform, AA345, 1:250  
 $\beta$ -tubulin, guinea pig, Unige antibody platform, AA344, 1:250  
 HA,Rat (3F10) Roche, 11815016001, 1:250  
 GFP, Torrey Pines Biolabs, TP401, 1:250  
 ubiquitin (ubiquitin B), ThermoFisher, PA1-26088, 1:1000  
 Ter119, Invitrogen, 11-5921-82, 1:1000  
 myc, Sigma- Aldrich, SAB4300319, 1:1000  
 anti-Ubiquitin K48, Merk, ZRB2150, 1:10000  
 anti-Ubiquitin K63, Merk, 05-1308, 1:1000  
 anti-mouse Alexa 488, Invitrogen, A11001, 1:400  
 anti-guinea pig 488, Invitrogen, A11073, 1:400  
 anti-rat 488, Invitrogen, A11006, 1:400  
 anti-rabbit Alexa 405, Invitrogen, A31556, 1:400  
 anti-mouse Alexa 405, Invitrogen, A31553, 1:400  
 anti-guinea pig Alexa 647, Invitrogen, A21450, 1:400  
 anti-guinea pig 405, abcam, ab175678, 1:400  
 anti-MTIP, PMID16513191, 1:1000

## Validation

Centrin, mouse (20H5), Merck Millipore,04-1624 : Rashpa R, Brochet M (2022) PLOS Pathogens. 2022;18(1):e1010223. doi: 10.1371/journal.ppat.1010223.  
 $\alpha$ -tubulin, guinea pig, Unige antibody platform, AA345 : Rashpa R, Brochet M (2022) PLOS Pathogens. 2022;18(1):e1010223. doi: 10.1371/journal.ppat.1010223.  
 $\beta$ -tubulin, guinea pig, Unige antibody platform, AA344 : Rashpa R, Brochet M (2022) PLOS Pathogens. 2022;18(1):e1010223. doi: 10.1371/journal.ppat.1010223.  
 HA,Rat (3F10) Roche, 11815016001 : Rashpa R, Brochet M (2022) PLOS Pathogens. 2022;18(1):e1010223. doi: 10.1371/journal.ppat.1010223.  
 GFP, Torrey Pines Biolabs, TP401 : Bertiaux E et al PLoS Biol. 2021;19(3):e3001020. doi: 10.1371/journal.pbio.3001020.  
 ubiquitin (ubiquitin B), ThermoFisher, PA1-26088  
 Ter119, Invitrogen, 11-5921-82 : Balestra AC et al Sci Adv. 2021;7(13). doi: 10.1126/sciadv.abe5396.  
 myc, Sigma- Aldrich, SAB4300319  
 Anti-Ubiquitin K48, Merk, ZRB2150 : Green JL et al PLOS Pathogens. 2020;16(6):e1008640. doi: 10.1371/journal.ppat.1008640.  
 Anti-Ubiquitin K63, Merk, 05-1308 : Green JL et al PLOS Pathogens. 2020;16(6):e1008640. doi: 10.1371/journal.ppat.1008640.  
 anti-mouse Alexa 488, Invitrogen, A11001 : Rashpa R, Brochet M (2022) PLOS Pathogens. 2022;18(1):e1010223. doi: 10.1371/journal.ppat.1010223.  
 anti-guinea pig 488, Invitrogen, A11073 : Rashpa R, Brochet M (2022) PLOS Pathogens. 2022;18(1):e1010223. doi: 10.1371/journal.ppat.1010223.  
 anti-rat 488, Invitrogen, A11006 : Rashpa R, Brochet M (2022) PLOS Pathogens. 2022;18(1):e1010223. doi: 10.1371/journal.ppat.1010223.  
 anti-rabbit Alexa 405, Invitrogen, A31556 : Rashpa R, Brochet M (2022) PLOS Pathogens. 2022;18(1):e1010223. doi: 10.1371/journal.ppat.1010223.  
 anti-mouse Alexa 405, Invitrogen, A31553 : Rashpa R, Brochet M (2022) PLOS Pathogens. 2022;18(1):e1010223. doi: 10.1371/journal.ppat.1010223.  
 anti-guinea pig Alexa 647, Invitrogen, A21450 : Rashpa R, Brochet M (2022) PLOS Pathogens. 2022;18(1):e1010223. doi: 10.1371/journal.ppat.1010223.  
 anti-guinea pig 405, abcam, ab175678 : Rashpa R, Brochet M (2022) PLOS Pathogens. 2022;18(1):e1010223. doi: 10.1371/journal.ppat.1010223.  
 anti-MTIP, Jones ML et al, Mol Biochem Parasitol. 2006 May;147(1):74-84. doi: 10.1016/j.molbiopara.2006.01.009.

## Eukaryotic cell lines

Policy information about [cell lines and Sex and Gender in Research](#)

## Cell line source(s)

The wild type *P. berghei* ANKA 2.34 cell line was initially obtained from Dr Oliver Billker (the Sanger Institute) from reference

|                                                                      |                                                                                                                              |
|----------------------------------------------------------------------|------------------------------------------------------------------------------------------------------------------------------|
| Authentication                                                       | PMID15137943, the 615 cell line was obtained from Dr Nisha Philip (The University of Edinburgh) from reference PMID26118994. |
| Mycoplasma contamination                                             | None of the cell lines were formally authenticated. Expression of Tir1-myc was checked in all 615-derived lines.             |
| Commonly misidentified lines<br>(See <a href="#">ICLAC</a> register) | NA                                                                                                                           |

## Animals and other research organisms

Policy information about [studies involving animals](#); [ARRIVE guidelines](#) recommended for reporting animal research, and [Sex and Gender in Research](#)

|                         |                                                                                                                                                                                                                                                                                                                                                                                                                                                                                                                             |
|-------------------------|-----------------------------------------------------------------------------------------------------------------------------------------------------------------------------------------------------------------------------------------------------------------------------------------------------------------------------------------------------------------------------------------------------------------------------------------------------------------------------------------------------------------------------|
| Laboratory animals      | Six to twelve week-old mice were obtained from Charles River laboratories, and females were used for all experiments. Mice were specific pathogen free (including Mycoplasma pulmonis) and subjected to regular pathogen monitoring by sentinel screening. They were housed in individually ventilated cages furnished with a cardboard mouse house and Nestlet, maintained at $21 \pm 2^\circ\text{C}$ under a 12 hours light/dark cycle, and given commercially prepared autoclaved dry rodent diet and water ad libitum. |
| Wild animals            | The study did not involve wild animals                                                                                                                                                                                                                                                                                                                                                                                                                                                                                      |
| Reporting on sex        | Mice were solely used to grow Plasmodium berghei parasites and no analysis was performed on mice.                                                                                                                                                                                                                                                                                                                                                                                                                           |
| Field-collected samples | The study did not involve samples collected from the field                                                                                                                                                                                                                                                                                                                                                                                                                                                                  |
| Ethics oversight        | All animal experiments performed in Switzerland were conducted with the authorisation numbers GE102 and GE-58-19, according to the guidelines and regulations issued by the Swiss Federal Veterinary Office.                                                                                                                                                                                                                                                                                                                |

Note that full information on the approval of the study protocol must also be provided in the manuscript.
